# Supplementary material
Source: Springer Nature journal article supplement (https://www.springermedizin.de/resource/supplementary/12913_2013_2974_MOESM7_ESM.pdf/9532600)

### AGE-SEX versus ALL INFORMATION

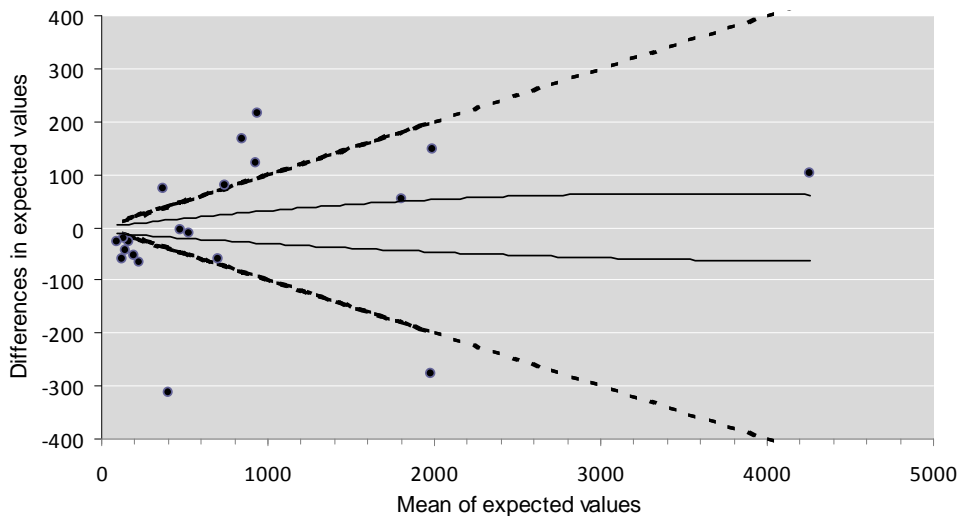

### INPATIENT MORBIDITY versus ALL INFORMATION

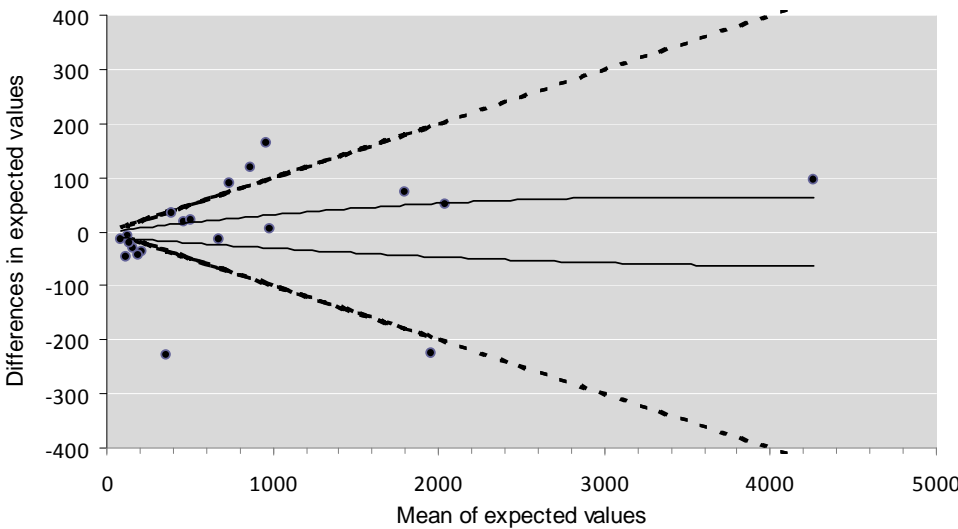

### OUTPATIENT MORBIDITY versus ALL INFORMATION

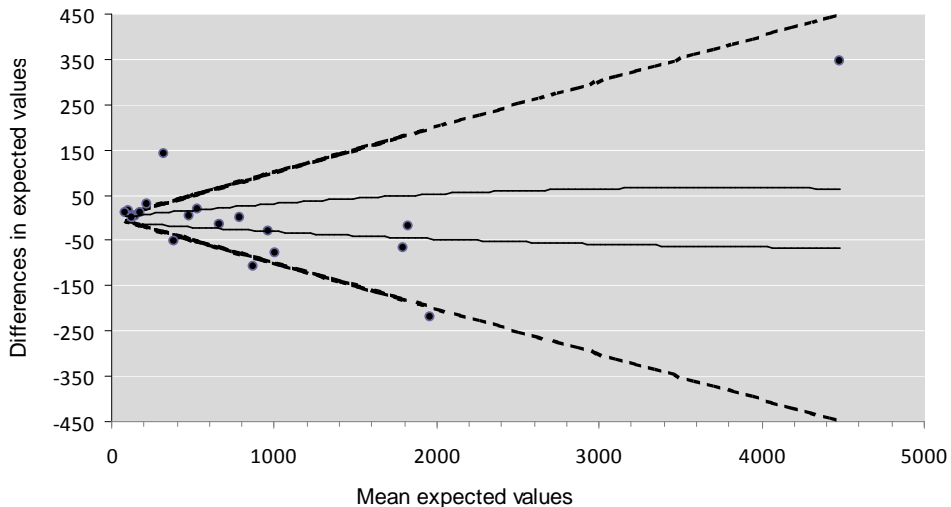

Supplement: MOESM7 [file 9532600]
